# Supplementary material
Source: PubMed Central journal article supplement (PMC2792909)
Supplement: NIHMS156855-supplement-1_si_001.pdf [file NIHMS156855-supplement-1_si_001.pdf]

# A Silica-Supported Iron Oxide Catalyst Capable of Activating Hydrogen Peroxide at Neutral pH Values

Anh Le-Tuan Pham<sup>1</sup>, Changha Lee<sup>1¶</sup>, Fiona M. Doyle<sup>2\*</sup> and David L. Sedlak<sup>1\*</sup>

<sup>1</sup> Department of Civil and Environmental Engineering

University of California at Berkeley

Berkeley, California 94720

<sup>2</sup> Department of Materials Science and Engineering

University of California at Berkeley

Berkeley, California 94720

\*Address correspondence to either author. Email: [fmdoyle@berkeley.edu](mailto:fmdoyle@berkeley.edu) (F.M.D.); [sedlak@ce.berkeley.edu](mailto:sedlak@ce.berkeley.edu) (D.L.S.). Phone: +1-510-333-1693 (F.M.D.); +1-510-643-0256 (D.L.S.). Fax: +1-510-643-5792 (F.M.D.); +1-510-642-7483 (D.L.S.)

¶ Present address: School of Urban and Environmental Engineering, Ulsan National Institute of Science and Technology (UNIST), 194 Banyeon-ri, Ulsan 698-805, South Korea

**Submitted to: *Environmental Science & Technology*, July 29, 2009**

**Contents (6 pages): Figure SI 1 – SI 5**

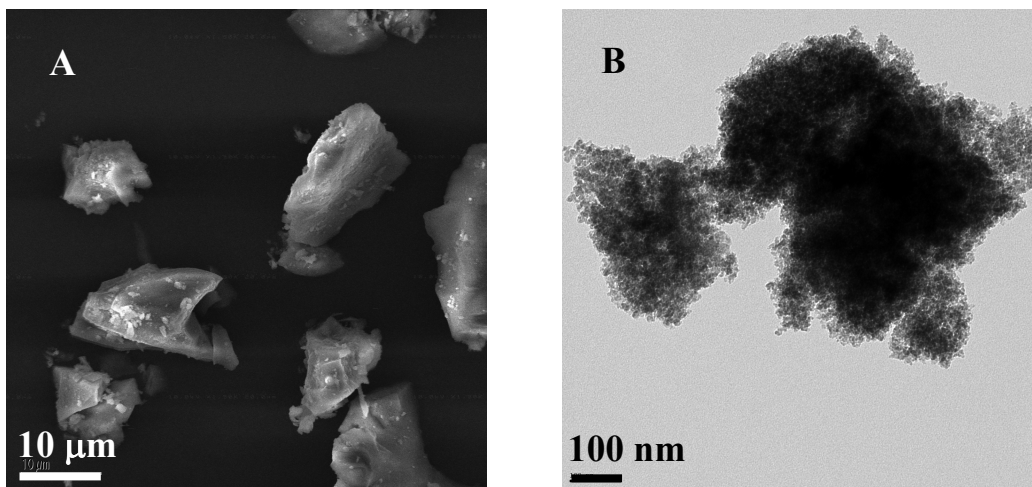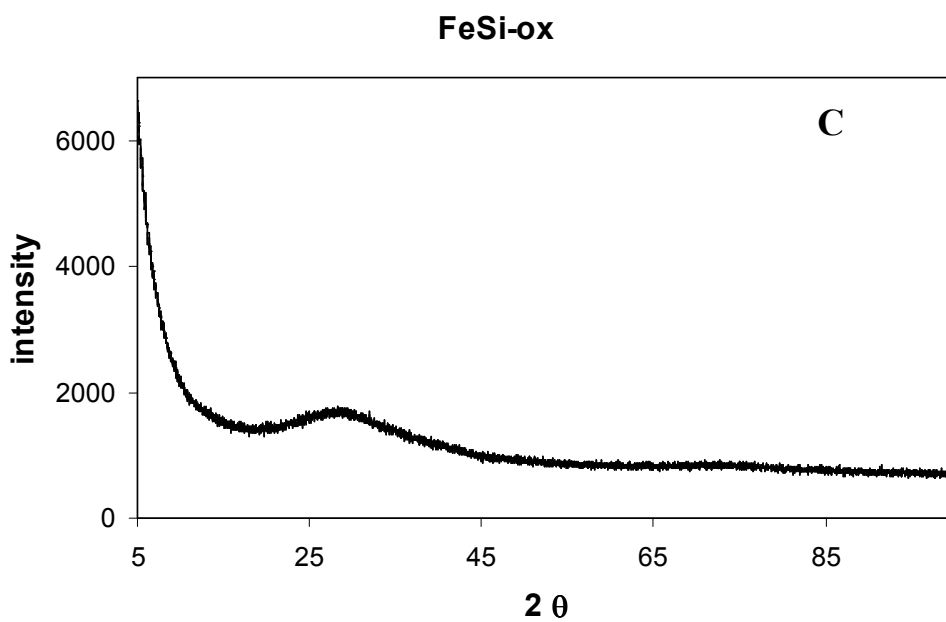

**Figure SI 1.** *FeSi-ox* obtained by sol – gel processing of aqueous mixture of  $\text{Fe}(\text{ClO}_4)_3$ ,  $\text{Al}(\text{NO}_3)_3$  and  $\text{TeOS}$ . (A) SEM. (B) TEM. (C) XRD.

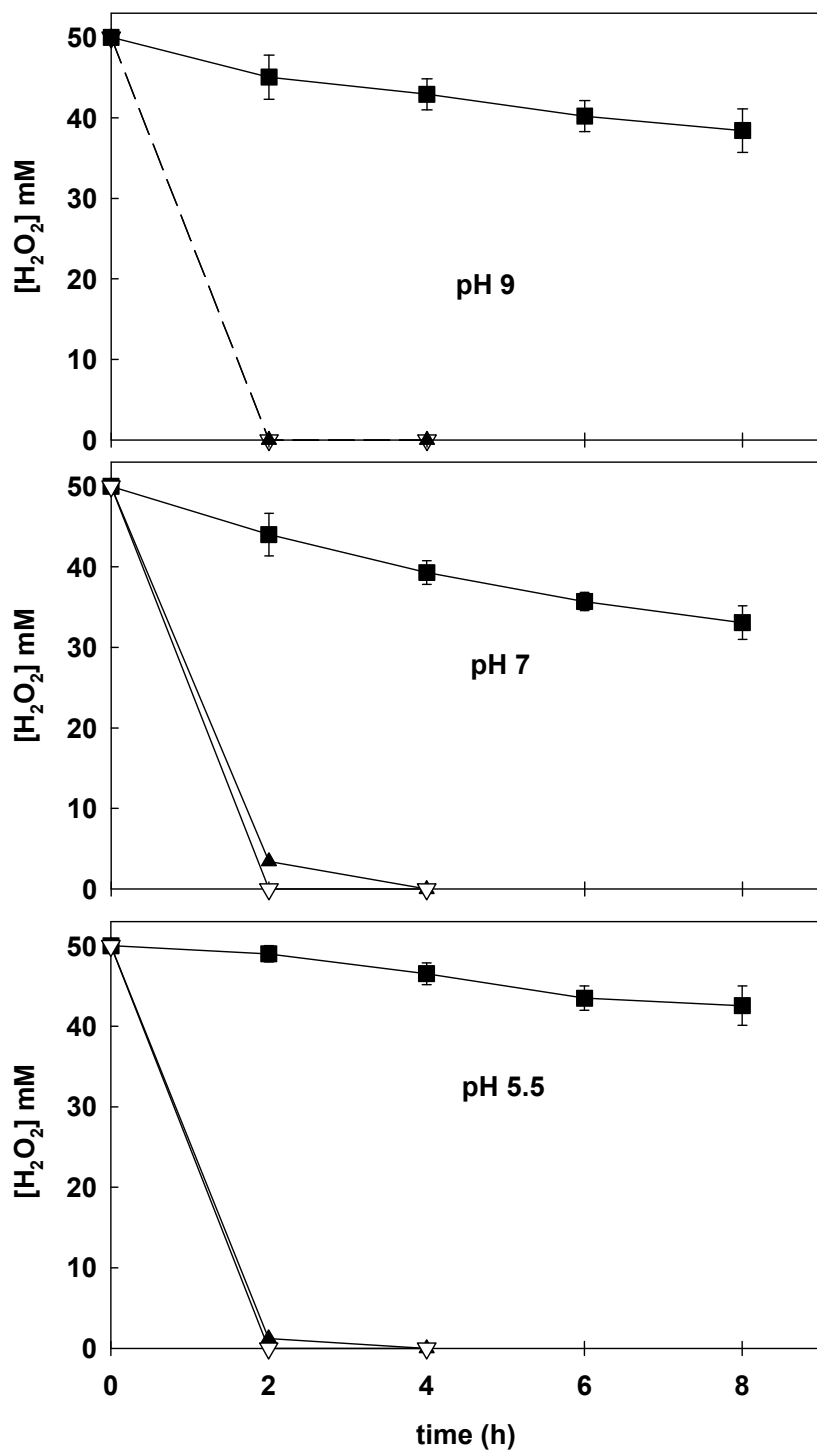

**Figure SI 2.**  $H_2O_2$  decomposition catalyzed by iron oxides: (■) hematite; (▽) amorphous FeOOH; (▲) goethite.  $[phenol]_0 = 0.5$  mM;  $[H_2O_2]_0 = 50$  mM;  $[iron\ oxide] = 3$  g/L.

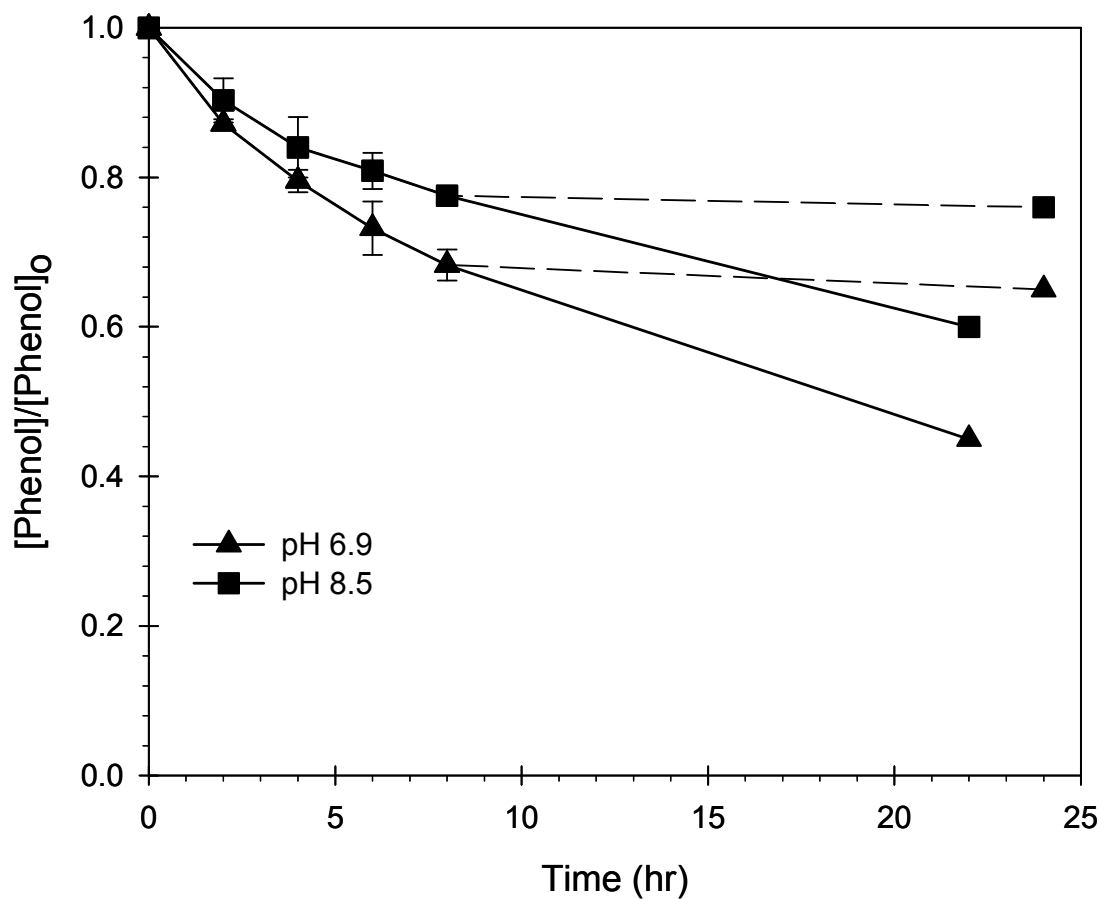

**Figure SI 3.** Phenol concentration as a function of time.  $[\text{phenol}]_0 = 0.5 \text{ mM}$ ;  $[\text{H}_2\text{O}_2] = 50 \text{ mM}$ ;  $[\text{FeAlSi-ox}] = 3 \text{ g/L}$ . At  $t = 8 \text{ hrs}$ , *FeAlSi-ox* was removed from the reactor and phenol concentration was followed (dashed lines).

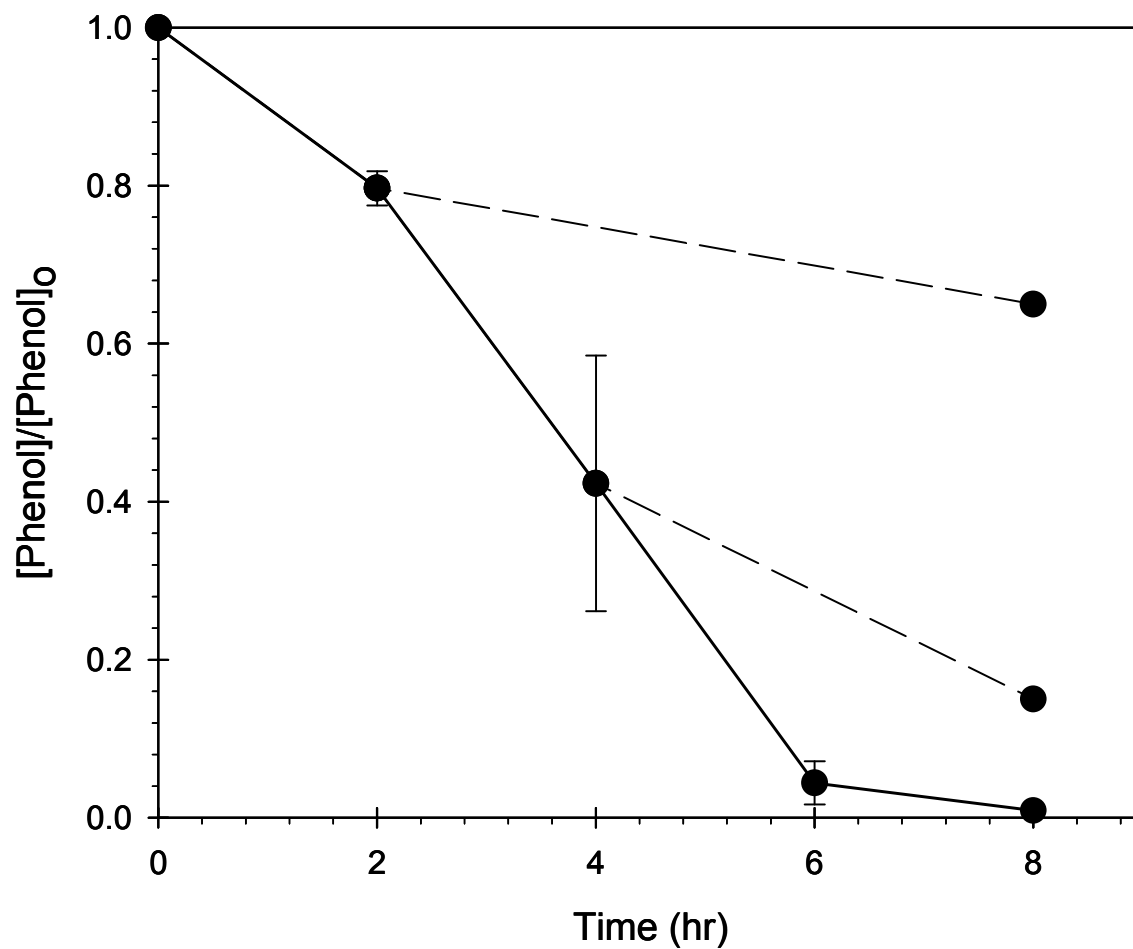

**Figure SI 4.** Phenol concentration as a function of time at pH 5.3.  $[\text{phenol}]_0 = 0.5 \text{ mM}$ ;  $[\text{H}_2\text{O}_2] = 50 \text{ mM}$ ;  $[\text{FeAlSi-ox}] = 3 \text{ g/L}$ . Phenol concentration was followed in the filtered samples (dashed lines).

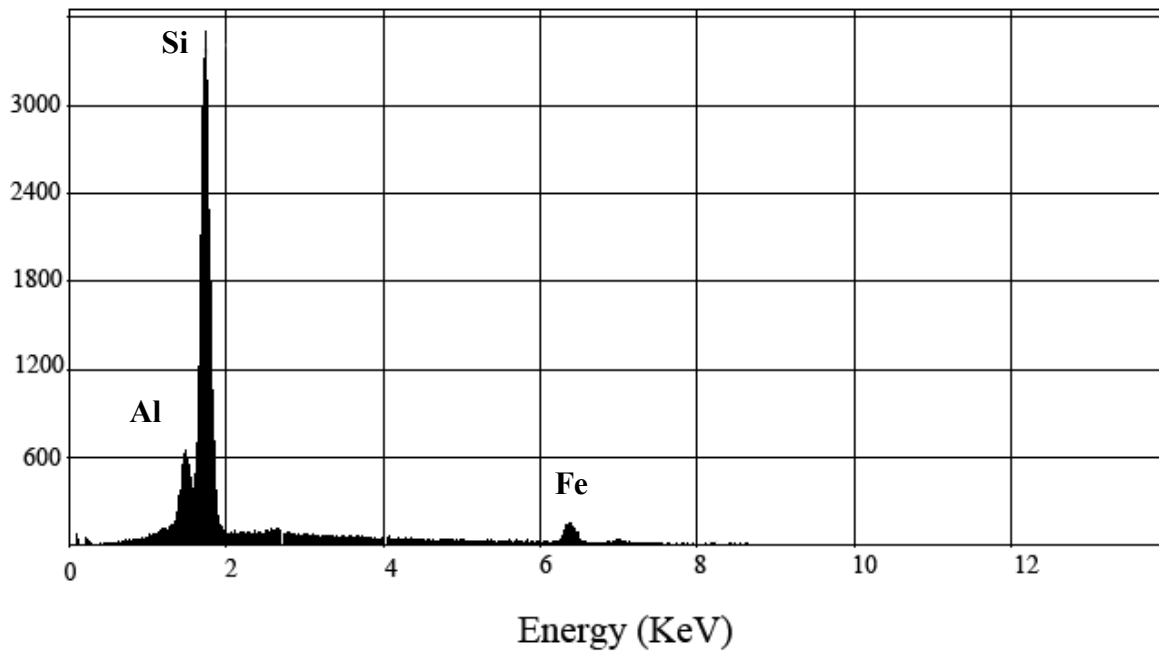

**Figure SI 5.** EDX spectra of *FeAlSi-ox*
